# Supplementary material for: Burden of shoulder and/neck pain among school teachers in Ethiopia
Source: PubMed Central journal article supplement (PMC6329165; doi:10.1186/s12891-019-2397-3), 2019-01-10
Supplement: 12891_2019_2397_MOESM1_ESM.pdf [file 12891_2019_2397_MOESM1_ESM.pdf]

**Appendix 1: Ethiopian school teacher shoulder/and neck pain [EST-SNP]  
Questionnaire**

**English version Questionnaire**

**Date:**

| <b>Socio-demographic information:</b> |                             | <b>Questionnaire unique ID:</b>                                      |             |
|---------------------------------------|-----------------------------|----------------------------------------------------------------------|-------------|
| <b>Data collector ID:</b>             |                             | <b>Response</b>                                                      | <b>Code</b> |
| 101                                   | Sex                         |                                                                      | D1          |
|                                       | If female aye you pregnant? | 1. Yes 2. No                                                         |             |
| 102                                   | Age                         |                                                                      | D2          |
| 103                                   | Educational status          | 1. Certificate<br>2. Diploma<br>3. Degree<br>4. Master               | D3          |
| 104                                   | Marital status              | 1. Single<br>2. Married<br>3. Divorced<br>4. Separated<br>5. Widowed | D4          |
| 105                                   | Handedness                  | 1. right<br>2. Left                                                  | D5          |
| 106                                   | Monthly income              |                                                                      | D6          |
| 107                                   | Height                      |                                                                      |             |
| 108                                   | Weight                      |                                                                      |             |
| 109                                   | Body mass index             |                                                                      | D7          |
| 110                                   | School level                | 1. Elementary<br>2. High school                                      | D8          |
| 111                                   | Working organization        | 1. Private<br>2. Governmental                                        | D9          |

| <b>Behavioral factors</b> |                                                                                   |                                                                                                                                                          |    |
|---------------------------|-----------------------------------------------------------------------------------|----------------------------------------------------------------------------------------------------------------------------------------------------------|----|
| 201                       | How would you describe your smoking habit?                                        | 1. Previous occasional smoker<br>2. Previous daily smoker<br>3. Non smoker<br>4. Current occasional smoker<br>5. Current occasional smoker               | B1 |
| 202                       | Do you consume alcohol?                                                           | 1. Yes 2. No                                                                                                                                             | B2 |
|                           | If yes how many bottles/ml in a week?                                             |                                                                                                                                                          |    |
| 203                       | Do you do physical exercise                                                       | 1. Yes 2. No                                                                                                                                             | B3 |
|                           | If yes how many minuets in a week?                                                |                                                                                                                                                          |    |
| <b>Shoulder/neck Pain</b> |                                                                                   |                                                                                                                                                          |    |
| 301                       | Have you ever had discomfort/pain around your shoulder/neck during last 12 month? | 1. Yes<br>2. No                                                                                                                                          | P1 |
| 302                       | If yes on which part of body you feel the pain?                                   | 1. Both (shoulder/neck)<br>2. Shoulder only<br>3. Neck only<br><br>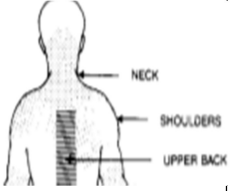 | P2 |
| 303                       | What is the onset of your pain?                                                   | 1. Gradual 2. Sudden                                                                                                                                     | P3 |
| 304                       | For how long do you feel this pain?                                               | 1. Less than 7 days<br>2. 7 days -7 weeks                                                                                                                | P4 |

|                                      |                                                                                                                                    |                                        |    |
|--------------------------------------|------------------------------------------------------------------------------------------------------------------------------------|----------------------------------------|----|
|                                      |                                                                                                                                    | 3. 8-12 weeks<br>4. More than 12 weeks |    |
| <b>305</b>                           | How severe is your pain?                                                                                                           | _____<br>___Mark on the 10cm line      | P5 |
| <b>306</b>                           | Do you have absenteeism from your work due to pain?                                                                                | 1. Yes 2. No                           | P6 |
| <b>307</b>                           | Does the pain go in to your arm or hand?                                                                                           | 1. Yes 2. No                           | P7 |
| <b>308</b>                           | Have you sought consultation with any doctor/Physiotherapists for your pain?                                                       | 1. Yes 2. No                           | P8 |
| <b>Work related physical factors</b> |                                                                                                                                    |                                        |    |
| <b>401</b>                           | Work experience                                                                                                                    | .....years                             | W1 |
| <b>402</b>                           | How many working hours of class do you have in a week?                                                                             | _____ mint its                         | W2 |
| <b>403</b>                           | How many students you teach in one class?                                                                                          | 1. 25-30<br>2. 30- 40<br>3. >40        | W3 |
| <b>404</b>                           | Have you ever experienced static head down posture more than 2- hours per day while correcting students work and other activities? | 1. Yes 2. No                           | W4 |
| <b>405</b>                           | Have you ever experienced elevated arm above your shoulder more than 2- hours per day while writing on blackboard?                 | 1. Yes 2. No                           | W5 |
| <b>406</b>                           | Have you ever experienced standing position more than 2- hours per day in a class?                                                 | 1. Yes 2. No                           | W6 |
| <b>407</b>                           | Have you ever experienced sitting position more than                                                                               | 1. Yes 2. No                           | W7 |

|                      |                                                                            |              |    |
|----------------------|----------------------------------------------------------------------------|--------------|----|
|                      | 4- hours per day in a class?                                               |              |    |
| <b>408</b>           | Do you have comfortable back support during sitting?                       | 1. Yes 2. No | W8 |
| <b>Comorbidities</b> |                                                                            |              |    |
| <b>501</b>           | Do you have diagnosed diabetes mellitus?                                   | 1. Yes 2. No | C1 |
| <b>502</b>           | Do you have diagnosed hypertension?                                        | 1. Yes 2. No | C2 |
| <b>503</b>           | Do you have diagnosed respiratory diseases (asthma)?                       | 1. Yes 2. No | C3 |
| <b>504</b>           | Have you ever had surgery around your shoulder/ neck area before 3- month? | 1. Yes 2. No | C4 |
| <b>505</b>           | Have you ever had trauma around your shoulder/ neck area before 3- month?  | 1. Yes 2. No | C5 |

|                             |                          |                        |                   |           |                   |                        |
|-----------------------------|--------------------------|------------------------|-------------------|-----------|-------------------|------------------------|
| <b>Psychosocial factors</b> |                          |                        |                   |           |                   |                        |
| 601.                        | Psychological job demand | To a very large extent | To a large extent | Somewhat  | To a small extent | To a very small extent |
| 602.                        | Supervisor support       | Always                 | Often             | Sometimes | Seldom            | Never/hardly ever)     |
| 603.                        | Social support           | Always                 | Often             | Sometimes | Seldom            | Never/hardly ever)     |
| 604.                        | Co-worker support        | Always                 | Often             | Sometimes | Seldom            | Never/hardly ever)     |
| 605.                        | Job satisfaction         | To a very large extent | To a large extent | Somewhat  | To a small extent | To a very small extent |

**Thank you for your participation!!!**

**Amharic version questionnaire**

**ጣህበራዊና ስነ-ህዝብ ጥረት**

|     |                       | የመልስ አማራጭ                                         | መ/ቁ |
|-----|-----------------------|---------------------------------------------------|-----|
| 101 | ጾታ                    | 1. ወንድ 2. ሴት                                      | D1  |
|     | ሴት ከሆኑ እርጉዝ ነዎት       | 1. አዎ 2. አይደለሁም                                   |     |
| 102 | ዕድሜ                   |                                                   | D2  |
| 103 | የትምህርት ደረጃ            | 1. ሰርቲፊኬት<br>2. ድፕሎማ<br>3. ድግሪ<br>4. ማስተርስ        | D3  |
| 104 | የጋብቻ ሁኔታ              | 1. ያለገባች<br>2. ያገባች<br>3. የፈታች<br>4. የሞተችበት/የሞተባች | D4  |
| 105 | ብዙ ጊዜ የሚትጠቀምበት/ሚበት እጅ | 1. ቀኝ 2. ግራ                                       | D5  |
| 106 | ወርሃዊ ክፍያ              |                                                   | D6  |
| 107 | ቁመትሀ/ሽ                |                                                   |     |
| 108 | ክብደትሀ/ሽ               |                                                   |     |
| 109 | የሰዉነትሀ/ተሽ ምልክታ        |                                                   | D7  |
| 110 | የምታሰተምርበት የትምህርት ደረጃ  | 1. አንደኛ ደረጃ<br>2. ሁለተኛ ደረጃ                        | D8  |
| 111 | የምትሰራበት ምስራቤት         | 1. የግል 2. የመንግስት                                  | D9  |

| የግል ልማድ የሚመለከት መረጃ |                     |                |    |
|--------------------|---------------------|----------------|----|
| 201                | ስጋራ የሚጨነቅ ልማድ አለህ/ሽ | 1. አልፎ አልፎ አጭነ | B1 |

|                           |                                                                    |                                                                                       |    |
|---------------------------|--------------------------------------------------------------------|---------------------------------------------------------------------------------------|----|
|                           |                                                                    | ነበር<br>2. በየቀኑ አጭር ነበር<br>3. አላጭም<br>4. አልፎ አልፎ አጭረሁ<br>5. በየቀኑ አጭረሁ                  |    |
| 202                       | አልኮል ትጠጣለህ/ሽ                                                       | 1. አዎ 2. አላጠጣም                                                                        | B2 |
|                           | አዎ ከሆነ በሳምንት ምን ያሽል                                                |                                                                                       |    |
| 203                       | የአካል ብቃት እንቅስቃሴ ትሰራለህ/ሽ                                            | 1. አዎ 2. አልሰራም                                                                        | B3 |
|                           | አዎ ከሆነ በሳምንት ምን ያህል ደቂቃ                                            |                                                                                       |    |
| <b>የትክክር/አንገት ህመም መረጃ</b> |                                                                    |                                                                                       |    |
| 301                       | ባለፉት 12 ወራት በትክክር/ሽና አንገትህ/ሽ አከባቢ ህመም ወይም ጥሩ ያልሆነ ስሜት ተሰምቶህ/ሽ ያውቃል | 1. አዎ 2. አያውቅም                                                                        | P1 |
| 302                       | መልስህ አዎ ከሆነ የትኩረት የሰውነት አከባቢ ነው (በስዕሉ ላይ መጠቀም ይቻላል)                | 1. ትክክር አንገት አከባቢ<br>2. ትክክር አከባቢ ብቻ<br>3. አንገት አከባቢ ብቻ                               | P2 |
|                           |                                                                    | 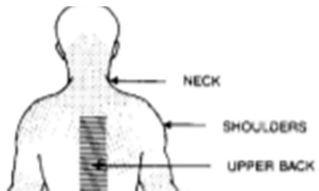 |    |
| 303                       | የህመሙ አጀማመር እንዴት ነበር                                                | 1. በሂደት 2. በድንገት                                                                      | P3 |
| 304                       | ህመሙ ለምን ያሽል ጊዜ ተሰምቶሃል/ሻል                                           | 1. ከ7 ቀን በታች<br>2. ከ7 ቀን እስከ 7 ሳምንት<br>3. 8-12 ሳምንት<br>4. ከ12 ሳምንት በላይ                | P4 |
| 305                       | የህመሙ መጠን ምን ያሽል ይሆናል                                               |                                                                                       | P5 |

|                           |                                                                                             |                                 |    |
|---------------------------|---------------------------------------------------------------------------------------------|---------------------------------|----|
|                           |                                                                                             | ከ1 እስከ 10 ስገለጽ                  |    |
| 306                       | በህመሙ ምክንያት ከስራ ቀርተህ/ሽ ታዉቃለህ                                                                 | 1.አዎ 2. አላዉቅም                   | P6 |
| 307                       | ህመሙ ወደ ክንድህ/ሽና አጅህ/ሽ አከባቢ ይደርሳል                                                             | 1. አዎ 2. አይደርስም                 | P7 |
| 308                       | ለህመምህ/ሽ የጤና ባለሙያ/ሐኪም አማክረህ ታዉቃለህ                                                            | 1. አዎ 2.አላዉቅም                   | P8 |
| <b>ከስራ ጋራ የተያያዘ መረጃ</b>   |                                                                                             |                                 |    |
| 401                       | በመምህርነት ምን ያኽል ገዜ አገልግለሃል/ሻል                                                                | .....ዓመት                        | W1 |
| 402                       | በሰዓት ምን ያኽል ሰዓት ታስተምራለህ/ሽ                                                                   | _____ ደቂቃ                       | W2 |
| 403                       | በአንድ ክፍል ምን ያህል ተማሪ አለ                                                                      | 1. 25-30<br>2. 30- 40<br>3. >40 | W3 |
| 404                       | የተማሪዎች ስራ ለማረም፣ ዕቅድ ለማዘጋጀት ወይም በምታስተም/ሚርበት ጊዜ በቀን አንገትህ/ሽ አጥፏል/ሽ በአማካኝ ከሁለት ሰዓት በላይ ትቆያለህ/ሽ | 1. አዎ 2. አልቆይም                  | W4 |
| 405                       | ሰሌዳ ላይ በምትጽፍበት ጊዜ በቀን ክንድህ/ሽ ከትክኻህ/ሽ በላይ አድርገህ በአማካኝ ከሁለት ሰዓት በላይ ትቆያለህ/ሽ                   | 1. አዎ 2. አልቆይም                  | W5 |
| 406                       | በምታስተምርበት ጊዜ በቀን ከሁለት ሰዓት በላይ ትቆማለህ/ሽ                                                       | 1.አዎ 2. አልቆምም                   | W6 |
| 407                       | በምታስተምርበት ጊዜ በቀን ከአራት ሰዓት በላይ ትቀመጣለህ/ሽ                                                      | 1.አዎ 2. አልቀመጥም                  | W7 |
| 408                       | በምትቀመጥበት ጊዜ አመቺ የሆነ የወገብ ድጋፍ ያለዉ ወንበር ትጠቀማለህ                                                | 1.አዎ 2. አልጠቀምም                  | W8 |
| <b>ተገቢዎቹ የጤና ችግሮች መረጃ</b> |                                                                                             |                                 |    |
| 501                       | በህክምና የታወቀ የሰፈር ህመም አለብህ/ሽ                                                                  | 1.አዎ 2. የለኝም                    | C1 |
| 502                       | በህክምና የታወቀ የደም ገፊት አለብህ/ሽ                                                                   | 1.አዎ 2. የለኝም                    | C2 |
| 503                       | በህክምና የታወቀ የመተንፈስ ችግር አለብህ/ሽ                                                                | 1. አዎ 2. የለኝም                   | C3 |
| 504                       | ከሦስት ወር በፊት በትክኻህና አንገትህ አከባቢ ቀዶ ጥገና ተሰርቶልህ ያዉቃል                                            | 1. አዎ 2. አያዉቅም                  | C4 |

|     |                                              |                |    |
|-----|----------------------------------------------|----------------|----|
| 504 | ከሦስት ወር በፊት በትክክልና አነገጥሞ አከባቢ አደጋ አጋጥሞህ ያዉቃል | 1. አዎ 2. አያዉቅም | C5 |
|-----|----------------------------------------------|----------------|----|

| ስነ-ልቦናዊና ማህበራዊ ሙረጃ |                                                                    |               |           |                |                |                    |
|--------------------|--------------------------------------------------------------------|---------------|-----------|----------------|----------------|--------------------|
| 601.               | በምታስተምርበት አከባቢ ባለ የመማር ማስተማር ስነ-ልቦናዊ ዝግጅትና የሞራል ድጋፍ ምን ያኽል ትረካለህ/ሽ | እጅግ በጣም እረካለሁ | በጣም እረካለሁ | በዉሱን መጠን እረካለሁ | በጣም በትንሹ እረካለሁ | እጅግ በጣም በተነሹ እረካለሁ |
| 602.               | አለቃህ ምን ያኽል ይረዳሃል                                                  | ሁሉ ጊዜ         | ብዙ ጊዜ     | አንዳንድ ጊዜ       | እምብዛም          | አያግዝኝም             |
| 603.               | በምታስተምርበት አከባቢ ያለው ማህበረ ሰብ ምን ያኽል ይረዳሃል                            | ሁሉ ጊዜ         | ብዙ ጊዜ     | አንዳንድ ጊዜ       | እምብዛም          | አያግዝኝም             |
| 604.               | የስራ ባልደረባህ/ሽ ምን ያኽል ያግዝሃል /ያግዝሻል                                   | ሁሉ ጊዜ         | ብዙ ጊዜ     | አንዳንድ ጊዜ       | እምብዛም          | አያግዝኝም             |
| 605.               | በስራህ/ሽ ምን ያኽል ትረካለህ/ሽ                                              | እጅግ በጣም እረካለሁ | በጣም እረካለሁ | በዉሱን መጠን እረካለሁ | በጣም በትንሹ እረካለሁ | እጅግ በጣም በተነሹ እረካለሁ |
